# Supplementary material for: Tuning the electronic and optical properties of hg-C3N4 quantum dots with edge-functionalization: a computational perspective
Source: Royal Society of Chemistry journal article supplement (doi:10.1039/d3tc03023g), 2023-12-04
Supplement: d3tc03023g1.pdf [file d3tc03023g1.pdf]

## Supporting Information for

# Tuning the electronic and optical properties of hg-C<sub>3</sub>N<sub>4</sub> quantum dots with edge-functionalization: A computational perspective

Khushboo Dange, Vaishali Roondhe, and Alok Shukla\*

*Department of Physics, Indian Institute of Technology Bombay, Powai, Mumbai  
400076, India*

This supporting information is divided into four sections. The first section contains the calculated bond lengths and bond angles for the considered structures. The second section contains the discussion on their Raman spectra and some unique vibrational modes. The third section contains the plots of total density of states (TDOS) and partial density of states (PDOS) for the pristine and edge-functionalized hg-C<sub>3</sub>N<sub>4</sub> QDs. The last section contains the UV-vis absorption spectra for all the pristine structures and the information related to the excited states contributing to the most intense peaks in the absorption spectra as well as the first excited state of all the structures considered in this work.

### A. Bond lengths and bond angles

**Table S1:** Calculated bond lengths and bond angles for the atoms that are nearby the attached functional groups for all the considered structures.

| Structure           | Bond Lengths | Cal. (Å) | Bond Angles | Cal. (°) | Structure         | Bond Lengths | Cal. (Å) | Bond Angles | Cal. (°) |
|---------------------|--------------|----------|-------------|----------|-------------------|--------------|----------|-------------|----------|
| 1-Pris              | C4-N16       | 1.35     | N16-C4-N8   | 116.0    | 4-COOH            | C33-N43      | 1.38     | N43-C33-N36 | 119.3    |
|                     | C4-N8        | 1.34     | N16-C4-N7   | 116.0    |                   | C33-N37      | 1.34     | N43-C33-N37 | 112.1    |
|                     | C4-N7        | 1.34     | N7-C4-N8    | 127.9    |                   | C33-N36      | 1.33     | N37-C33-N36 | 128.6    |
| 1-CH <sub>3</sub>   | C4-N16       | 1.35     | N16-C4-N8   | 114.8    | 4-OH              | C33-N43      | 1.34     | N43-C33-N36 | 114.6    |
|                     | C4-N8        | 1.34     | N16-C4-N7   | 117.8    |                   | C33-N37      | 1.35     | N43-C33-N37 | 116.5    |
|                     | C4-N7        | 1.35     | N7-C4-N8    | 127.4    |                   | C33-N36      | 1.39     | N37-C33-N36 | 128.8    |
| 1-CHO               | C4-N16       | 1.38     | N16-C4-N8   | 112.2    | 4-F               | C33-N43      | 1.38     | N43-C33-N36 | 118.3    |
|                     | C4-N8        | 1.34     | N16-C4-N7   | 119.1    |                   | C33-N37      | 1.33     | N43-C33-N37 | 111.8    |
|                     | C4-N7        | 1.32     | N7-C4-N8    | 128.7    |                   | C33-N36      | 1.34     | N37-C33-N36 | 129.7    |
| 1-COCH <sub>3</sub> | C4-N16       | 1.38     | N16-C4-N8   | 112.0    | 5-Pris            | C50-N62      | 1.34     | N62-C50-N59 | 115.9    |
|                     | C4-N8        | 1.34     | N16-C4-N7   | 119.6    |                   | C50-N61      | 1.35     | N62-C50-N61 | 115.9    |
|                     | C4-N7        | 1.33     | N7-C4-N8    | 128.4    |                   | C50-N59      | 1.35     | N61-C50-N59 | 128.1    |
| 1-COOH              | C4-N16       | 1.38     | N16-C4-N8   | 112.0    | 5-CH <sub>3</sub> | C50-N62      | 1.34     | N62-C50-N59 | 117.7    |
|                     | C4-N8        | 1.34     | N16-C4-N7   | 119.3    |                   | C50-N61      | 1.35     | N62-C50-N61 | 117.7    |
|                     | C4-N7        | 1.33     | N7-C4-N8    | 128.7    |                   | C50-N59      | 1.35     | N61-C50-N59 | 127.5    |

|                     |         |      |             |       |                     |         |      |             |       |
|---------------------|---------|------|-------------|-------|---------------------|---------|------|-------------|-------|
| 1-OH                | C4-N16  | 1.35 | N16-C4-N8   | 116.5 | 5-CHO               | C50-N62 | 1.38 | N62-C50-N59 | 118.9 |
|                     | C4-N8   | 1.34 | N16-C4-N7   | 114.7 |                     | C50-N61 | 1.34 | N62-C50-N61 | 112.2 |
|                     | C4-N7   | 1.34 | N7-C4-N8    | 128.8 |                     | C50-N59 | 1.33 | N61-C50-N59 | 128.8 |
| 1-F                 | C4-N16  | 1.39 | N16-C4-N8   | 111.7 | 5-COCH <sub>3</sub> | C50-N62 | 1.38 | N62-C50-N59 | 119.5 |
|                     | C4-N8   | 1.34 | N16-C4-N7   | 118.3 |                     | C50-N61 | 1.35 | N62-C50-N61 | 112.0 |
|                     | C4-N7   | 1.32 | N7-C4-N8    | 129.8 |                     | C50-N59 | 1.33 | N61-C50-N59 | 128.5 |
| 3-Pris              | C18-N30 | 1.34 | N30-C18-N27 | 115.9 | 5-COOH              | C50-N62 | 1.38 | N62-C50-N59 | 119.1 |
|                     | C18-N27 | 1.35 | N30-C18-N29 | 116.0 |                     | C50-N61 | 1.34 | N62-C50-N61 | 112.1 |
|                     | C18-N29 | 1.35 | N27-C18-N29 | 128.0 |                     | C50-N59 | 1.33 | N61-C50-N59 | 128.8 |
| 3-CH <sub>3</sub>   | C18-N30 | 1.34 | N30-C18-N27 | 114.7 | 5-OH                | C50-N62 | 1.34 | N62-C50-N59 | 114.6 |
|                     | C18-N27 | 1.35 | N30-C18-N29 | 117.8 |                     | C50-N61 | 1.34 | N62-C50-N61 | 116.4 |
|                     | C18-N29 | 1.35 | N27-C18-N29 | 127.4 |                     | C50-N59 | 1.35 | N61-C50-N59 | 129.0 |
| 3-CHO               | C18-N30 | 1.38 | N30-C18-N27 | 112.2 | 5-F                 | C50-N62 | 1.38 | N62-C50-N59 | 118.2 |
|                     | C18-N27 | 1.35 | N30-C18-N29 | 119.0 |                     | C50-N61 | 1.34 | N62-C50-N61 | 111.7 |
|                     | C18-N29 | 1.33 | N27-C18-N29 | 128.7 |                     | C50-N59 | 1.33 | N61-C50-N59 | 129.9 |
| 3-COCH <sub>3</sub> | C18-N30 | 1.38 | N30-C18-N27 | 112.0 | 6-Pris              | C85-N97 | 1.34 | N97-C85-N89 | 116.1 |
|                     | C18-N27 | 1.35 | N30-C18-N29 | 119.5 |                     | C85-N88 | 1.35 | N97-C85-N88 | 115.9 |
|                     | C18-N29 | 1.33 | N27-C18-N29 | 128.4 |                     | C85-N89 | 1.35 | N89-C85-N88 | 128.0 |
| 3-COOH              | C18-N30 | 1.38 | N30-C18-N27 | 112.0 | 6-CH <sub>3</sub>   | C85-N97 | 1.34 | N97-C85-N89 | 117.9 |
|                     | C18-N27 | 1.35 | N30-C18-N29 | 119.3 |                     | C85-N88 | 1.35 | N97-C85-N88 | 114.7 |
|                     | C18-N29 | 1.33 | N27-C18-N29 | 128.7 |                     | C85-N89 | 1.35 | N89-C85-N88 | 127.4 |
| 3-OH                | C18-N30 | 1.34 | N30-C18-N27 | 116.4 | 6-CHO               | C85-N97 | 1.38 | N97-C85-N89 | 119.0 |
|                     | C18-N27 | 1.35 | N30-C18-N29 | 114.6 |                     | C85-N88 | 1.35 | N97-C85-N88 | 112.3 |
|                     | C18-N29 | 1.35 | N27-C18-N29 | 128.9 |                     | C85-N89 | 1.33 | N89-C85-N88 | 128.7 |
| 3-F                 | C18-N30 | 1.38 | N30-C18-N27 | 111.7 | 6-COCH <sub>3</sub> | C85-N97 | 1.38 | N97-C85-N89 | 119.6 |
|                     | C18-N27 | 1.34 | N30-C18-N29 | 118.4 |                     | C85-N88 | 1.35 | N97-C85-N88 | 112.6 |
|                     | C18-N29 | 1.33 | N27-C18-N29 | 129.8 |                     | C85-N89 | 1.33 | N89-C85-N88 | 128.4 |
| 4-Pris              | C33-N43 | 1.34 | N43-C33-N36 | 116.0 | 6-COOH              | C85-N97 | 1.38 | N97-C85-N89 | 119.3 |
|                     | C33-N37 | 1.35 | N43-C33-N37 | 116.0 |                     | C85-N88 | 1.35 | N97-C85-N88 | 112.6 |
|                     | C33-N36 | 1.35 | N37-C33-N36 | 128.0 |                     | C85-N89 | 1.33 | N89-C85-N88 | 128.6 |
| 4-CH <sub>3</sub>   | C33-N43 | 1.35 | N43-C33-N36 | 117.8 | 6-OH                | C85-N97 | 1.34 | N97-C85-N89 | 114.6 |
|                     | C33-N37 | 1.35 | N43-C33-N37 | 114.8 |                     | C85-N88 | 1.35 | N97-C85-N88 | 116.4 |
|                     | C33-N36 | 1.34 | N37-C33-N36 | 127.4 |                     | C85-N89 | 1.35 | N89-C85-N88 | 128.9 |
| 4-CHO               | C33-N43 | 1.38 | N43-C33-N36 | 119.0 | 6-F                 | C85-N97 | 1.38 | N97-C85-N89 | 118.4 |
|                     | C33-N37 | 1.34 | N43-C33-N37 | 112.3 |                     | C85-N88 | 1.34 | N97-C85-N88 | 111.7 |
|                     | C33-N36 | 1.33 | N37-C33-N36 | 128.6 |                     | C85-N89 | 1.33 | N89-C85-N88 | 129.8 |
| 4-COCH <sub>3</sub> | C33-N43 | 1.38 | N43-C33-N36 | 119.6 |                     |         |      |             |       |
|                     | C33-N37 | 1.35 | N43-C33-N37 | 112.1 |                     |         |      |             |       |
|                     | C33-N36 | 1.33 | N37-C33-N36 | 128.3 |                     |         |      |             |       |

## B. Vibrational Properties: Raman Spectra

The computed Raman spectra corresponding to each of the considered structures is depicted in Fig. S1. The peaks in each of the plots can be classified into two regions: (i) the low-intensity region and (ii) the high-intensity region. As shown in Fig. S1(b), the low intensity peaks for all the considered 3-X structures fall in the frequency range 700–1700 cm<sup>-1</sup>, which arise mostly due to the deformation of C–N bonds because of their stretching and scissoring modes. In the frequency range 3000–4000 cm<sup>-1</sup>, peaks arise due to stretching vibrations of the N–H bonds, with the highest intensity near 3600 cm<sup>-1</sup>. In addition to these, peaks corresponding to unique vibrational modes of the bonds

of the attached functional groups are also present in the spectra of functionalized hg-C<sub>3</sub>N<sub>4</sub> QDs. In the Raman spectra of 3-CH<sub>3</sub> QD, stretching of the C-H bonds (of -CH<sub>3</sub>) gives rise to a peak at 3000 cm<sup>-1</sup>. For 3-CHO QD, vibrations due to stretching of C=O and C-H bonds are also present at the frequencies 1840 cm<sup>-1</sup> and 2920 cm<sup>-1</sup>, respectively. Similarly, in the case of 3-COCH<sub>3</sub> structure, stretching of the C=O bond occurs at 1837 cm<sup>-1</sup> whereas stretching of the C-H bonds occur in the frequency range 3000–3100 cm<sup>-1</sup>. In the case of 3-COOH structure, vibrations due to the attached functional group are present around 1870 cm<sup>-1</sup> which include stretching of the C=O and O-H bonds as well as scissoring of the O-C=O bond. In the Raman spectra of 3-OH and 3-F QDs, peaks around 3500 cm<sup>-1</sup> correspond to stretching of the O-H and O-F bonds, respectively. The Raman spectra of other pristine hg-C<sub>3</sub>N<sub>4</sub> QDs and their associated functionalized structures exhibit similar type of qualitative behavior, as illustrated in Figs. S1(a), (c), (d), and (e).

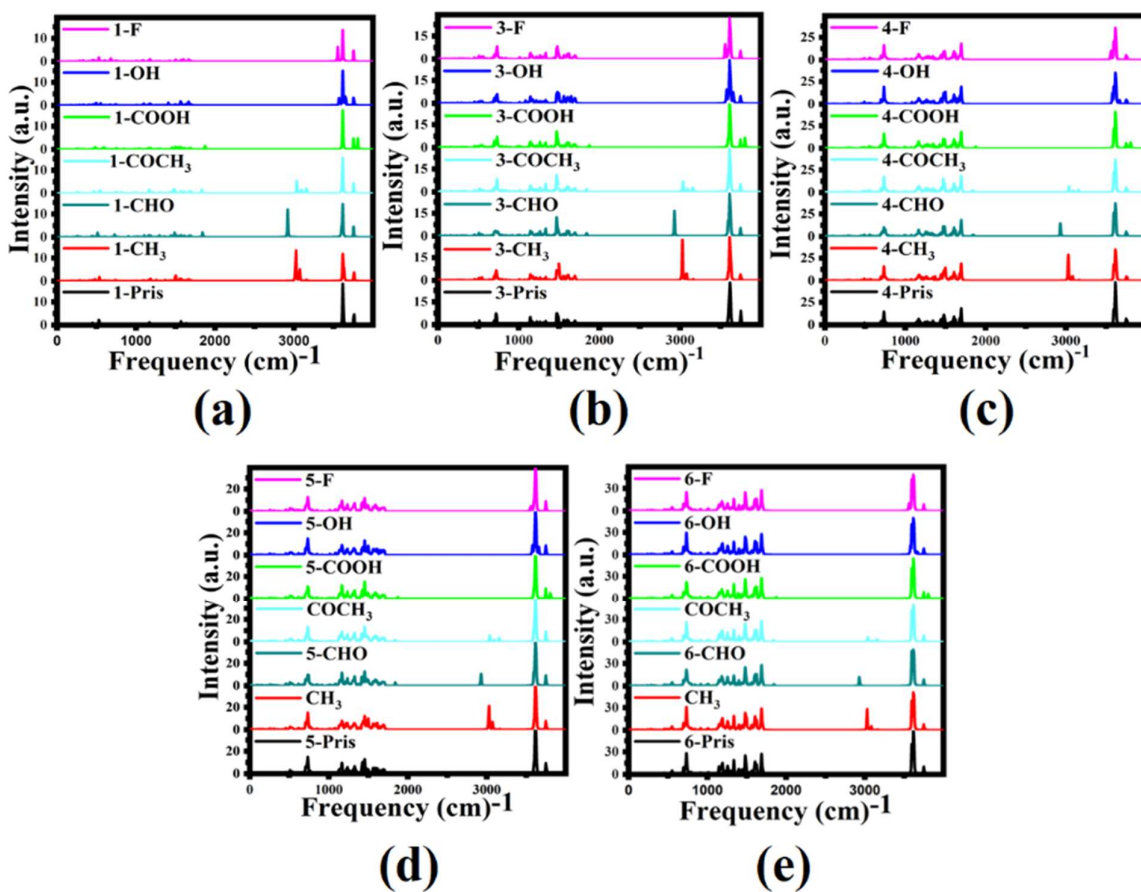

Figure S1: Raman spectra plots of (a) 1-X, (b) 3-X, (c) 4-X, (d) 5-X, and (e) 6-X structures. X represents the attached functional groups (-Pris, -CH<sub>3</sub>, -CHO, -COCH<sub>3</sub>, -COOH, -OH, and -F).

### C. Total and partial density of states plots for the considered hg-C<sub>3</sub>N<sub>4</sub> quantum dots

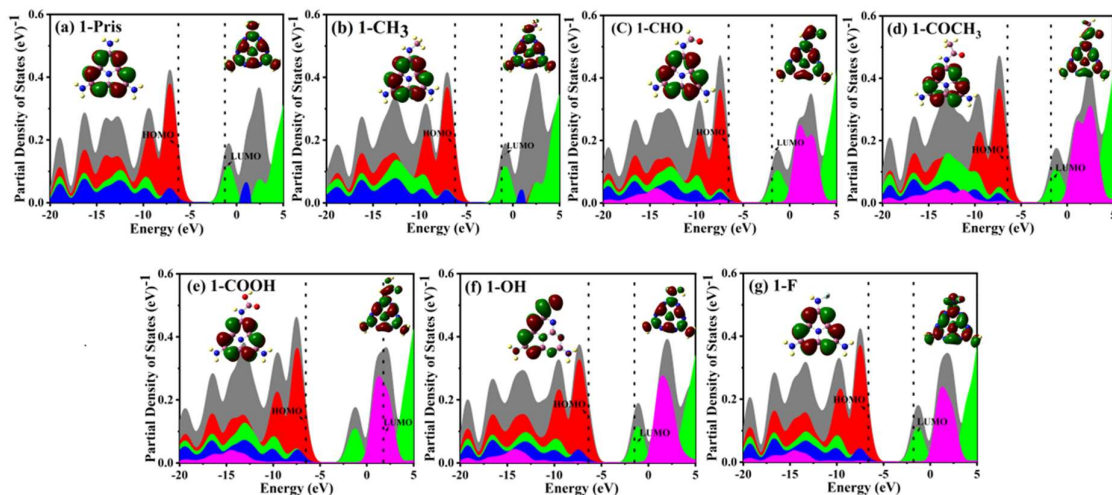

**Figure S2:** TDOS and PDOS plots of (a) 1-Pris, (b) 1-CH<sub>3</sub>, (c) 1-CHO, (d) 1-COCH<sub>3</sub>, (e) 1-COOH, (f) 1-OH, and (g) 1-F structures. Grey represents the TDOS. Red, green, blue, and magenta colors represent the contributions of H, N, C, and O or F atoms, respectively. Corresponding HOMO and LUMO are shown in the inset of each plot.

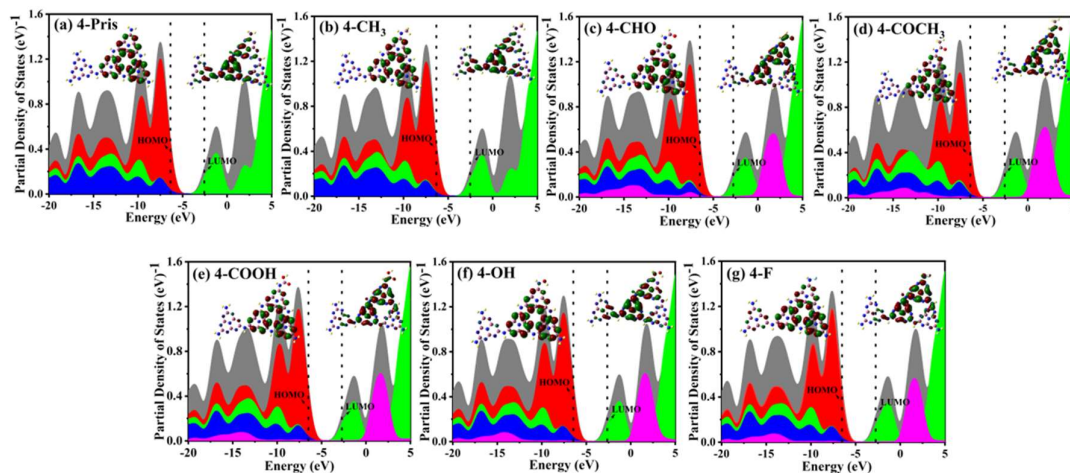

**Figure S3:** TDOS and PDOS plots of (a) 4-Pris, (b) 4-CH<sub>3</sub>, (c) 4-CHO, (d) 4-COCH<sub>3</sub>, (e) 4-COOH, (f) 4-OH, and (g) 4-F structures. Grey represents the TDOS. Red, green, blue, and magenta colors represent the contributions of H, N, C, and O or F atoms, respectively. Corresponding HOMO and LUMO are shown in the inset of each plot.

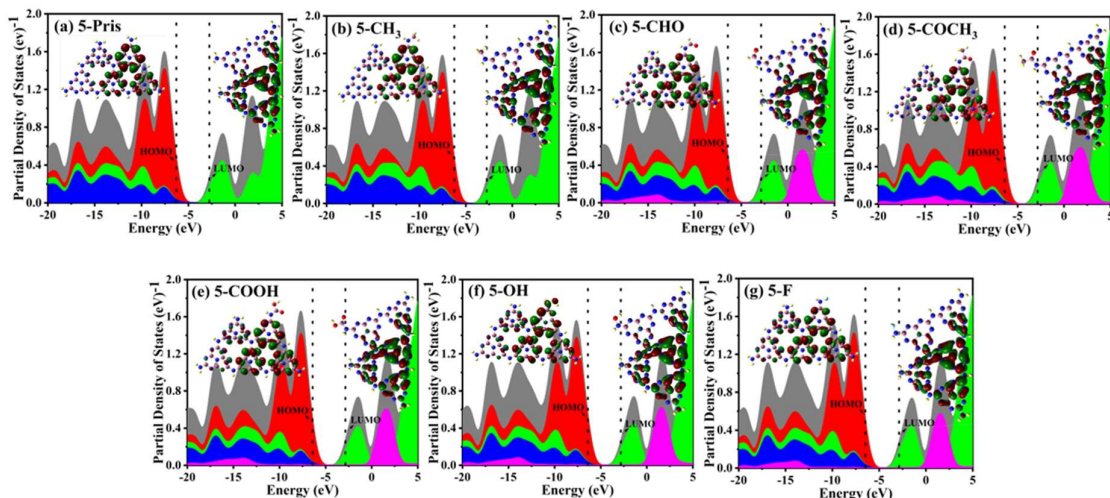

**Figure S4:** TDOS and PDOS plots of (a) 5-Pris, (b) 5-CH<sub>3</sub>, (c) 5-CHO, (d) 5-COCH<sub>3</sub>, (e) 5-COOH, (f) 5-OH, and (g) 5-F structures. Grey represents the TDOS. Red, green, blue, and magenta colors represent the contributions of H, N, C, and O or F atoms, respectively. Corresponding HOMO and LUMO are shown in the inset of each plot.

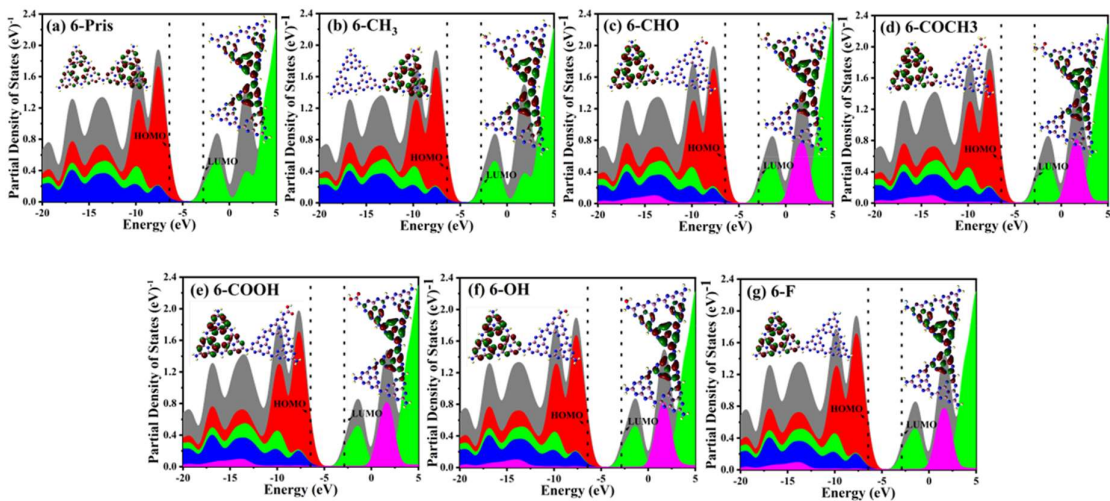

**Figure S5:** TDOS and PDOS plots of (a) 6-Pris, (b) 6-CH<sub>3</sub>, (c) 6-CHO, (d) 6-COCH<sub>3</sub>, (e) 6-COOH, (f) 6-OH, and (g) 6-F structures. Grey represents the TDOS. Red, green, blue, and magenta colors represent the contributions of H, N, C, and O or F atoms, respectively. Corresponding HOMO and LUMO are shown in the inset of each plot.



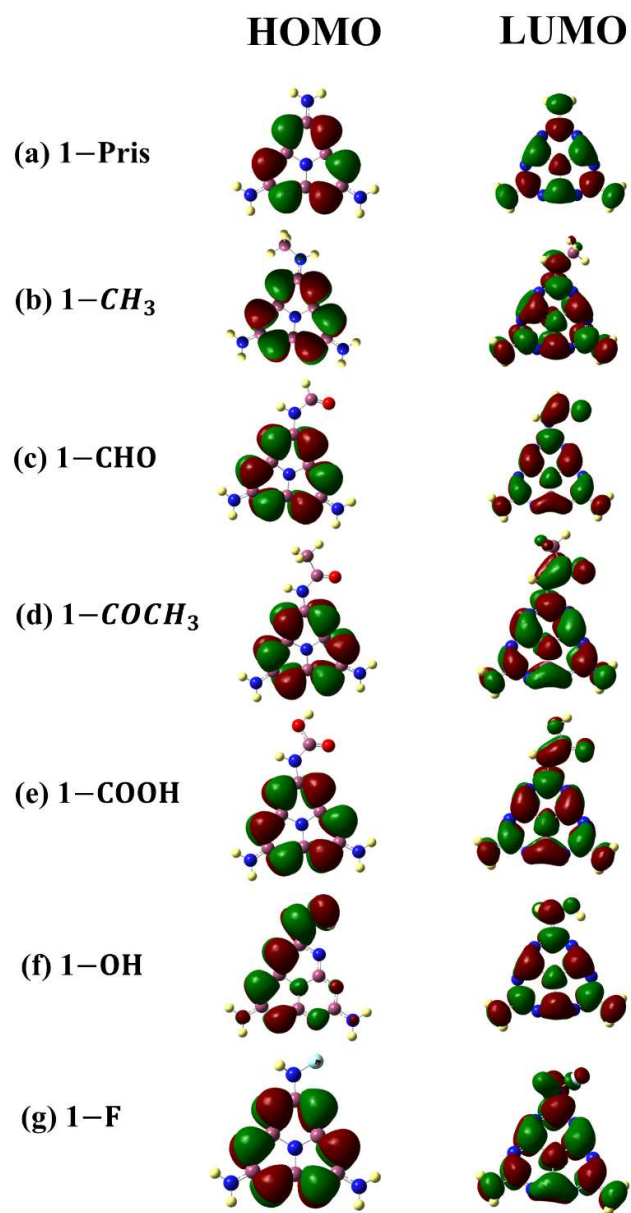

**Figure S6:** HOMO and LUMO plots for the 1-X structures obtained using HSE06 functional.

## D. UV-vis absorption spectra, TD-DFT wave functions, and spatial distribution of photo-induced electrons and holes

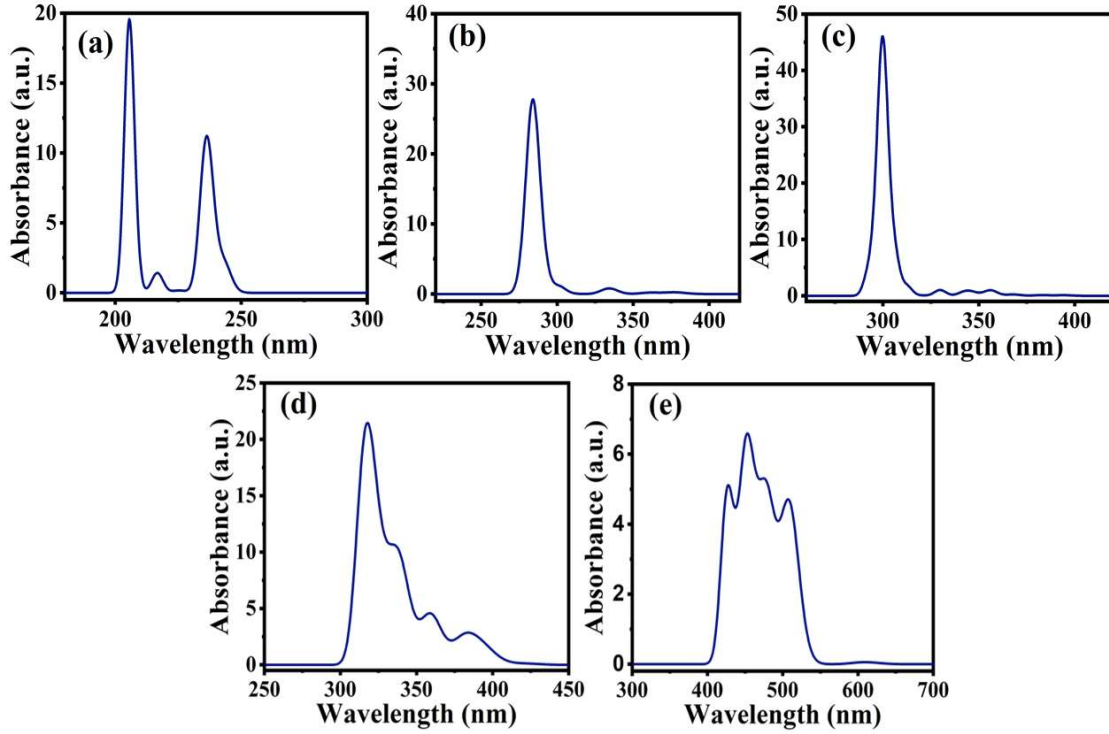

**Figure S7:** UV-vis absorption spectra of (a) 1-Pris, (b) 3-Pris, (c) 4-Pris, (d) 5-Pris, and (e) 6-Pris structures.

**Table S2:** TD-DFT wave functions, excitation energies ( $E_x$ ) and oscillator strengths ( $f$ ) corresponding to the most intense peaks in the absorption spectra of “1-X” hg- $C_3N_4$  Qds. Below a configuration  $H-m \rightarrow L+n$  implies a single excitation from the HOMO -  $m$  orbital to the LUMO +  $n$  orbital.

| Structure           | State   | Configuration                     | Coefficient | $E_x$ (eV)    | $f$  |
|---------------------|---------|-----------------------------------|-------------|---------------|------|
| 1-Pris              | $20^1A$ | $ H - 4 \rightarrow L + 1\rangle$ | 0.5092      | 6.03 (205 nm) | 1.02 |
|                     |         | $ H - 2 \rightarrow L + 1\rangle$ | -0.2173     |               |      |
|                     |         | $ H - 1 \rightarrow L + 1\rangle$ | 0.2170      |               |      |
| 1-CH <sub>3</sub>   | $12^1A$ | $ H - 1 \rightarrow L + 1\rangle$ | 0.3398      | 5.95 (208 nm) | 0.35 |
|                     |         | $ H - 1 \rightarrow L + 2\rangle$ | 0.4118      |               |      |
|                     |         | $ H - 4 \rightarrow L\rangle$     | 0.3195      |               |      |
| 1-CHO               | $20^1A$ | $ H - 3 \rightarrow L + 2\rangle$ | 0.5623      | 5.93 (209 nm) | 0.80 |
|                     |         | $ H - 1 \rightarrow L + 1\rangle$ | -0.3170     |               |      |
|                     |         | $ H \rightarrow L + 1\rangle$     | 0.1383      |               |      |
| 1-COCH <sub>3</sub> | $13^1A$ | $ H - 6 \rightarrow L\rangle$     | 0.6549      | 5.41 (229 nm) | 0.56 |
|                     |         | $ H - 3 \rightarrow L + 1\rangle$ | 0.1732      |               |      |
|                     |         | $ H - 1 \rightarrow L + 1\rangle$ | 0.1095      |               |      |

|        |                   |                                   |         |               |      |
|--------|-------------------|-----------------------------------|---------|---------------|------|
| 1-COOH | 14 <sup>1</sup> A | $ H - 6 \rightarrow L\rangle$     | 0.6276  | 5.56 (223 nm) | 0.57 |
|        |                   | $ H - 2 \rightarrow L + 1\rangle$ | 0.2950  |               |      |
| 1-OH   | 10 <sup>1</sup> A | $ H - 1 \rightarrow L + 1\rangle$ | 0.3678  | 5.20 (238 nm) | 0.37 |
|        |                   | $ H - 1 \rightarrow L + 2\rangle$ | -0.3248 |               |      |
|        |                   | $ H - 2 \rightarrow L\rangle$     | -0.2989 |               |      |
| 1-F    | 20 <sup>1</sup> A | $ H - 2 \rightarrow L + 2\rangle$ | 0.3665  | 5.96 (208 nm) | 1.00 |
|        |                   | $ H - 4 \rightarrow L + 2\rangle$ | 0.3243  |               |      |
|        |                   | $ H - 5 \rightarrow L + 2\rangle$ | 0.3056  |               |      |

**Table S3:** The same information as in Table S2 but for the “3-X” hg-C<sub>3</sub>N<sub>4</sub> QDs.

| Structure           | State             | Configuration                     | Coefficient | E <sub>x</sub> (eV) | <i>f</i> |
|---------------------|-------------------|-----------------------------------|-------------|---------------------|----------|
| 3-Pris              | 14 <sup>1</sup> A | $ H - 6 \rightarrow L\rangle$     | 0.4449      | 4.36 (284 nm)       | 0.97     |
|                     |                   | $ H - 5 \rightarrow L + 1\rangle$ | -0.3542     |                     |          |
|                     |                   | $ H - 4 \rightarrow L\rangle$     | 0.2579      |                     |          |
| 3-CH <sub>3</sub>   | 16 <sup>1</sup> A | $ H - 6 \rightarrow L\rangle$     | 0.3937      | 4.38 (283 nm)       | 0.50     |
|                     |                   | $ H - 5 \rightarrow L\rangle$     | 0.2959      |                     |          |
|                     |                   | $ H - 6 \rightarrow L + 1\rangle$ | -0.2192     |                     |          |
| 3-CHO               | 16 <sup>1</sup> A | $ H - 3 \rightarrow L + 1\rangle$ | 0.3043      | 4.31<br>(287.7 nm)  | 0.85     |
|                     |                   | $ H - 5 \rightarrow L\rangle$     | 0.2917      |                     |          |
|                     |                   | $ H - 6 \rightarrow L + 1\rangle$ | 0.2527      |                     |          |
| 3-COCH <sub>3</sub> | 16 <sup>1</sup> A | $ H - 6 \rightarrow L + 1\rangle$ | 0.3656      | 4.32 (287 nm)       | 0.90     |
|                     |                   | $ H - 3 \rightarrow L + 1\rangle$ | -0.3040     |                     |          |
|                     |                   | $ H - 7 \rightarrow L\rangle$     | -0.2778     |                     |          |
| 3-COOH              | 15 <sup>1</sup> A | $ H \rightarrow L + 3\rangle$     | 0.3280      | 4.31 (288 nm)       | 0.40     |
|                     |                   | $ H - 6 \rightarrow L\rangle$     | 0.3004      |                     |          |
|                     |                   | $ H - 3 \rightarrow L + 1\rangle$ | -0.2949     |                     |          |
| 3-OH                | 17 <sup>1</sup> A | $ H - 5 \rightarrow L\rangle$     | 0.3578      | 4.36 (284 nm)       | 0.80     |
|                     |                   | $ H - 6 \rightarrow L\rangle$     | -0.2961     |                     |          |
|                     |                   | $ H - 6 \rightarrow L + 1\rangle$ | -0.2479     |                     |          |
| 3-F                 | 14 <sup>1</sup> A | $ H \rightarrow L + 3\rangle$     | 0.3101      | 4.31 (287 nm)       | 0.50     |
|                     |                   | $ H - 5 \rightarrow L + 1\rangle$ | -0.2843     |                     |          |
|                     |                   | $ H - 4 \rightarrow L\rangle$     | -0.2595     |                     |          |

**Table S4:** The same information as in Table S2 but for the “4-X” hg-C<sub>3</sub>N<sub>4</sub> QDs.

| Structure           | State             | Configuration                     | Coefficient | E <sub>x</sub> (eV) | <i>f</i> |
|---------------------|-------------------|-----------------------------------|-------------|---------------------|----------|
| 4-Pris              | 16 <sup>1</sup> A | $ H - 6 \rightarrow L + 1\rangle$ | 0.2821      | 4.14 (299 nm)       | 0.70     |
|                     |                   | $ H - 6 \rightarrow L\rangle$     | 0.2185      |                     |          |
|                     |                   | $ H - 7 \rightarrow L\rangle$     | -0.1951     |                     |          |
| 4-CH <sub>3</sub>   | 18 <sup>1</sup> A | $ H - 7 \rightarrow L\rangle$     | 0.4045      | 4.16 (298 nm)       | 1.3      |
|                     |                   | $ H - 8 \rightarrow L\rangle$     | 0.3146      |                     |          |
|                     |                   | $ H - 5 \rightarrow L\rangle$     | -0.2475     |                     |          |
| 4-CHO               | 17 <sup>1</sup> A | $ H - 4 \rightarrow L\rangle$     | 0.3253      | 4.12 (301 nm)       | 0.80     |
|                     |                   | $ H - 6 \rightarrow L + 1\rangle$ | 0.2513      |                     |          |
|                     |                   | $ H \rightarrow L + 3\rangle$     | 0.2075      |                     |          |
| 4-COCH <sub>3</sub> | 17 <sup>1</sup> A | $ H - 4 \rightarrow L\rangle$     | 0.2551      | 4.12 (301 nm)       | 1.00     |
|                     |                   | $ H - 7 \rightarrow L + 1\rangle$ | 0.2178      |                     |          |
|                     |                   | $ H - 6 \rightarrow L + 1\rangle$ | -0.2066     |                     |          |



|        |                   |                                   |         |               |      |
|--------|-------------------|-----------------------------------|---------|---------------|------|
| 4-COOH | 16 <sup>1</sup> A | $ H - 6 \rightarrow L + 1\rangle$ | 0.3328  | 4.11 (301 nm) | 1.30 |
|        |                   | $ H - 6 \rightarrow L\rangle$     | 0.2526  |               |      |
|        |                   | $ H - 4 \rightarrow L\rangle$     | -0.2338 |               |      |
| 4-OH   | 18 <sup>1</sup> A | $ H - 7 \rightarrow L\rangle$     | 0.3569  | 4.15 (298 nm) | 1.26 |
|        |                   | $ H - 6 \rightarrow L\rangle$     | -0.2712 |               |      |
|        |                   | $ H - 9 \rightarrow L\rangle$     | 0.2109  |               |      |
| 4-F    | 16 <sup>1</sup> A | $ H - 6 \rightarrow L + 1\rangle$ | 0.3139  | 4.11 (301 nm) | 1.20 |
|        |                   | $ H - 4 \rightarrow L\rangle$     | -0.2616 |               |      |
|        |                   | $ H - 6 \rightarrow L\rangle$     | 0.2527  |               |      |

**Table S5:** The same information as in Table S2 but for the “5-X” hg-C<sub>3</sub>N<sub>4</sub> QDs.

| Structure           | State             | Configuration                              | Coefficient | E <sub>x</sub> (eV) | <i>f</i> |
|---------------------|-------------------|--------------------------------------------|-------------|---------------------|----------|
| 5-Pris              | 15 <sup>1</sup> A | $ H - 5 \rightarrow L + 1\rangle$          | 0.3091      | 3.90 (318 nm)       | 0.02     |
|                     |                   | $ H - 6 \rightarrow L + 1\rangle$          | -0.2092     |                     |          |
|                     |                   | $ H - 5 \rightarrow L\rangle$              | -0.1928     |                     |          |
| 5-CH <sub>3</sub>   | 14 <sup>1</sup> A | $ H - 6 \rightarrow L\rangle$              | 0.3071      | 3.90 (318 nm)       | 0.03     |
|                     |                   | $ H - 6 \rightarrow L + 1\rangle$          | -0.2400     |                     |          |
|                     |                   | $ H - 5 \rightarrow L + 1\rangle$          | -0.1996     |                     |          |
| 5-CHO               | 17 <sup>1</sup> A | $ H - 1 \rightarrow L + 3\rangle$          | 0.3216      | 3.92 (316 nm)       | 0.02     |
|                     |                   | $ H \rightarrow L + 3\rangle$              | 0.2912      |                     |          |
|                     |                   | $ H - 5 \rightarrow L\rangle$              | 0.2832      |                     |          |
| 5-COCH <sub>3</sub> | 16 <sup>1</sup> A | $ H - 10 \rightarrow L\rangle$             | -0.2801     | 3.92 (316 nm)       | 0.03     |
|                     |                   | $ H - 3 \rightarrow L + 2\rangle$          | -0.2305     |                     |          |
|                     |                   | $ H - 5 \rightarrow L + 1\rangle$          | -0.2196     |                     |          |
| 5-COOH              | 18 <sup>1</sup> A | $ H - 10 \rightarrow L\rangle \rightarrow$ | 0.3228      | 3.93 (315 nm)       | 0.04     |
|                     |                   | $ H \rightarrow L + 3\rangle$              | 0.2362      |                     |          |
|                     |                   | $ H - 6 \rightarrow L\rangle$              | 0.2345      |                     |          |
| 5-OH                | 13 <sup>1</sup> A | $ H \rightarrow L + 2\rangle$              | 0.4466      | 3.88 (319 nm)       | 0.04     |
|                     |                   | $ H - 2 \rightarrow L + 1\rangle$          | -0.2895     |                     |          |
|                     |                   | $ H - 3 \rightarrow L + 1\rangle$          | -0.2504     |                     |          |
| 5-F                 | 18 <sup>1</sup> A | $ H - 10 \rightarrow L\rangle$             | 0.3333      | 3.93 (315 nm)       | 0.05     |
|                     |                   | $ H - 6 \rightarrow L\rangle$              | 0.2387      |                     |          |
|                     |                   | $ H \rightarrow L + 3\rangle$              | 0.2174      |                     |          |

**Table S6:** The same information as in Table S2 but for the “6-X” hg-C<sub>3</sub>N<sub>4</sub> QDs.

| Structure         | State             | Configuration                     | Coefficient | E <sub>x</sub> (eV) | <i>f</i> |
|-------------------|-------------------|-----------------------------------|-------------|---------------------|----------|
| 6-Pris            | 7 <sup>1</sup> A  | $ H - 1 \rightarrow L\rangle$     | 0.3960      | 2.72 (455 nm)       | 0.02     |
|                   |                   | $ H - 3 \rightarrow L\rangle$     | -0.3583     |                     |          |
|                   |                   | $ H - 2 \rightarrow L\rangle$     | -0.3026     |                     |          |
| 6-CH <sub>3</sub> | 13 <sup>1</sup> A | $ H - 5 \rightarrow L + 2\rangle$ | 0.3067      | 3.82 (324 nm)       | 0.08     |
|                   |                   | $ H - 4 \rightarrow L + 1\rangle$ | -0.2741     |                     |          |
|                   |                   | $ H - 5 \rightarrow L\rangle$     | -0.2423     |                     |          |
| 6-CHO             | 12 <sup>1</sup> A | $ H - 5 \rightarrow L + 1\rangle$ | 0.4625      | 3.76 (330 nm)       | 0.05     |
|                   |                   | $ H - 1 \rightarrow L + 1\rangle$ | 0.2697      |                     |          |
|                   |                   | $ H - 3 \rightarrow L + 1\rangle$ | -0.2448     |                     |          |

|                     |                   |                |         |               |      |
|---------------------|-------------------|----------------|---------|---------------|------|
| 6-COCH <sub>3</sub> | 12 <sup>1</sup> A | H - 5 → L + 1) | 0.3116  | 3.74 (331 nm) | 0.06 |
|                     |                   | H - 1 → L + 1) | 0.4405  |               |      |
|                     |                   | H - 8 → L + 1) | 0.1629  |               |      |
| 6-COOH              | 12 <sup>1</sup> A | H - 5 → L + 1) | 0.4481  | 3.70 (335 nm) | 0.06 |
|                     |                   | H - 1 → L + 1) | 0.3037  |               |      |
|                     |                   | H - 3 → L + 1) | -0.2227 |               |      |
| 6-OH                | 13 <sup>1</sup> A | H - 1 → L + 1) | 0.3756  | 3.74 (332 nm) | 0.14 |
|                     |                   | H - 1 → L + 3) | -0.2859 |               |      |
|                     |                   | H - 2 → L + 2) | -0.2452 |               |      |
| 6-F                 | 12 <sup>1</sup> A | H - 5 → L + 1) | 0.4108  | 3.72 (333 nm) | 0.06 |
|                     |                   | H - 1 → L + 1) | 0.2965  |               |      |
|                     |                   | H - 3 → L + 1) | -0.2395 |               |      |

**Table S7:** The oscillator strengths ( $f$ ) and excitation energies ( $E_x$ ) corresponding to the first excited state ( $1^1A$ ) with the TD-DFT wave function dominated by the HOMO (H) → LUMO (L) excitation.

| Structure           | $E_x$ (eV) | $f$    |
|---------------------|------------|--------|
| 1-Pris              | 4.06       | 0.0000 |
| 1-CH <sub>3</sub>   | 4.09       | 0.0003 |
| 1-CHO               | 3.79       | 0.0097 |
| 1-COCH <sub>3</sub> | 3.83       | 0.0079 |
| 1-COOH              | 3.85       | 0.0066 |
| 1-OH                | 4.07       | 0.0055 |
| 1-F                 | 4.07       | 0.0045 |
| 3-Pris              | 3.26       | 0.0005 |
| 3-CH <sub>3</sub>   | 3.24       | 0.0004 |
| 3-CHO               | 3.16       | 0.0011 |
| 3-COCH <sub>3</sub> | 3.18       | 0.0013 |
| 3-COOH              | 3.18       | 0.0015 |
| 3-OH                | 3.23       | 0.0007 |
| 3-F                 | 3.20       | 0.0014 |
| 4-Pris              | 3.14       | 0.0032 |
| 4-CH <sub>3</sub>   | 3.15       | 0.0031 |
| 4-CHO               | 3.10       | 0.0000 |
| 4-COCH <sub>3</sub> | 3.11       | 0.0002 |
| 4-COOH              | 3.11       | 0.0003 |
| 4-OH                | 3.15       | 0.0020 |
| 4-F                 | 3.12       | 0.0003 |
| 5-Pris              | 2.95       | 0.0007 |
| 5-CH <sub>3</sub>   | 2.94       | 0.0006 |
| 5-CHO               | 2.95       | 0.0009 |
| 5-COCH <sub>3</sub> | 2.95       | 0.0008 |
| 5-COOH              | 2.95       | 0.0009 |

|                     |      |        |
|---------------------|------|--------|
| 5-OH                | 2.95 | 0.0007 |
| 5-F                 | 2.95 | 0.0010 |
| 6-Pris              | 2.03 | 0.0003 |
| 6-CH <sub>3</sub>   | 3.07 | 0.0037 |
| 6-CHO               | 3.06 | 0.0022 |
| 6-COCH <sub>3</sub> | 3.06 | 0.0026 |
| 6-COOH              | 3.06 | 0.0025 |
| 6-OH                | 3.07 | 0.0034 |
| 6-F                 | 3.06 | 0.0025 |

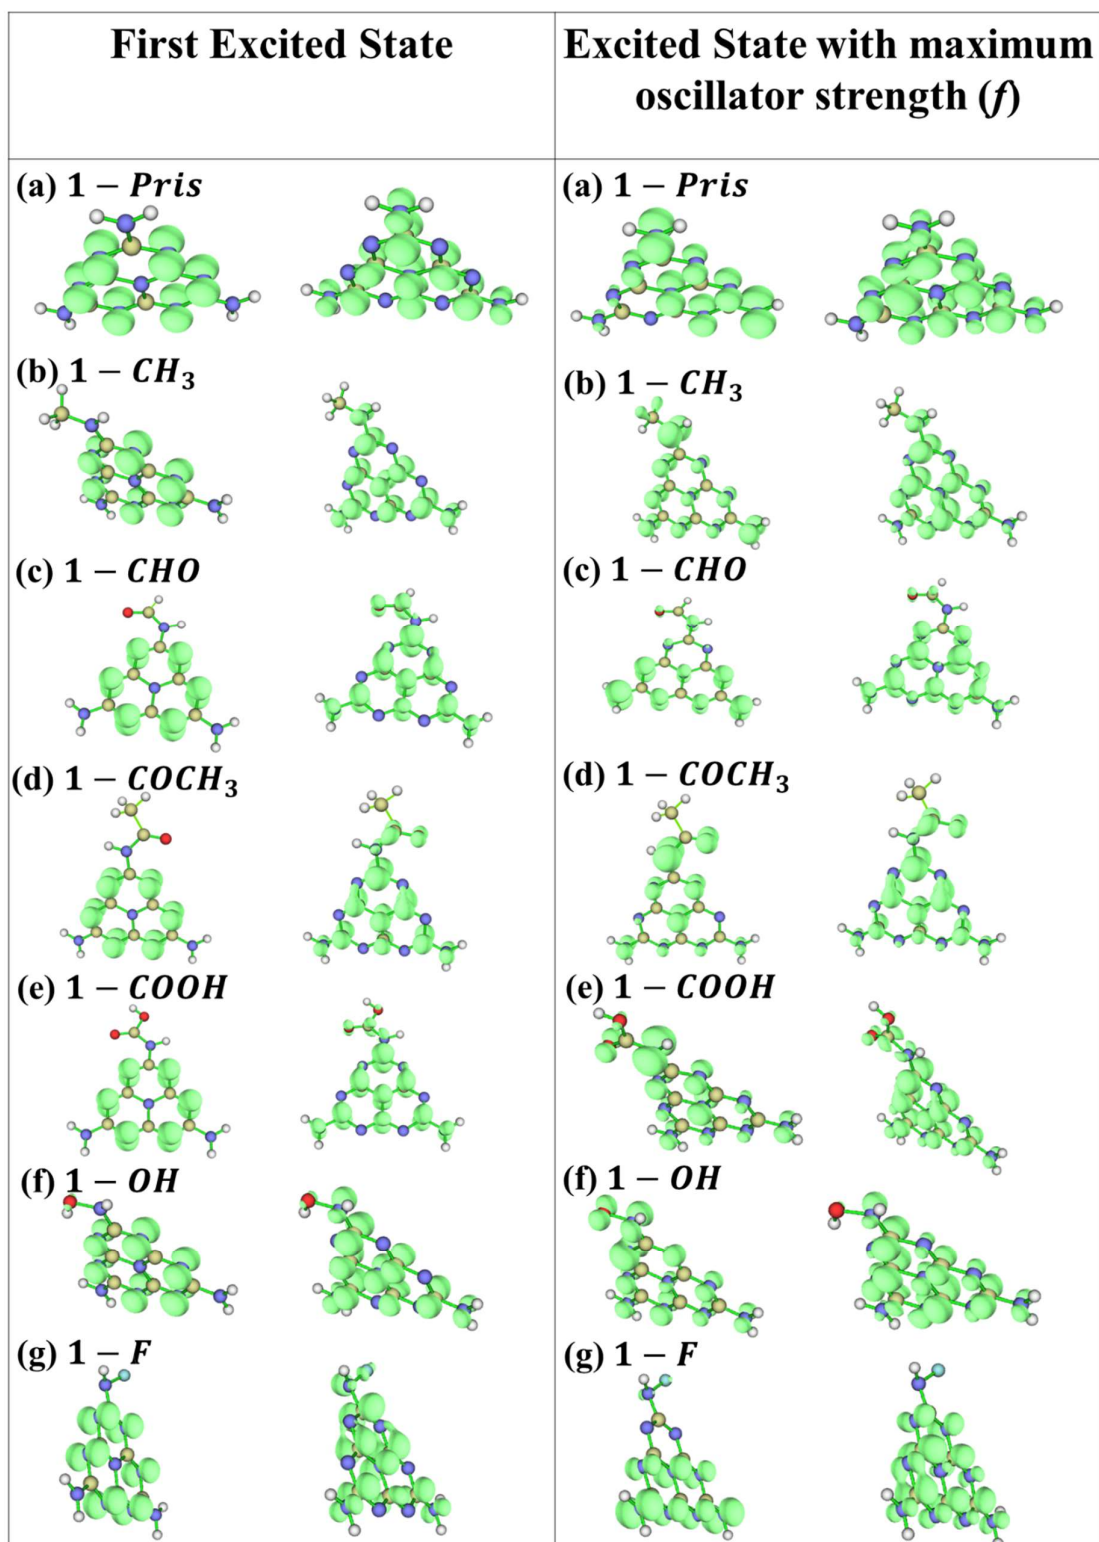

**Figure S8:** Spatial distribution (shown in green) of the photo-induced electrons (right) and holes (left) at the first excited state and the excited state with maximum oscillator strength for the 1-X structures. Here yellow, blue, grey, red, and cyan spheres represent the carbon, nitrogen, hydrogen, oxygen, and fluorine atoms, respectively.

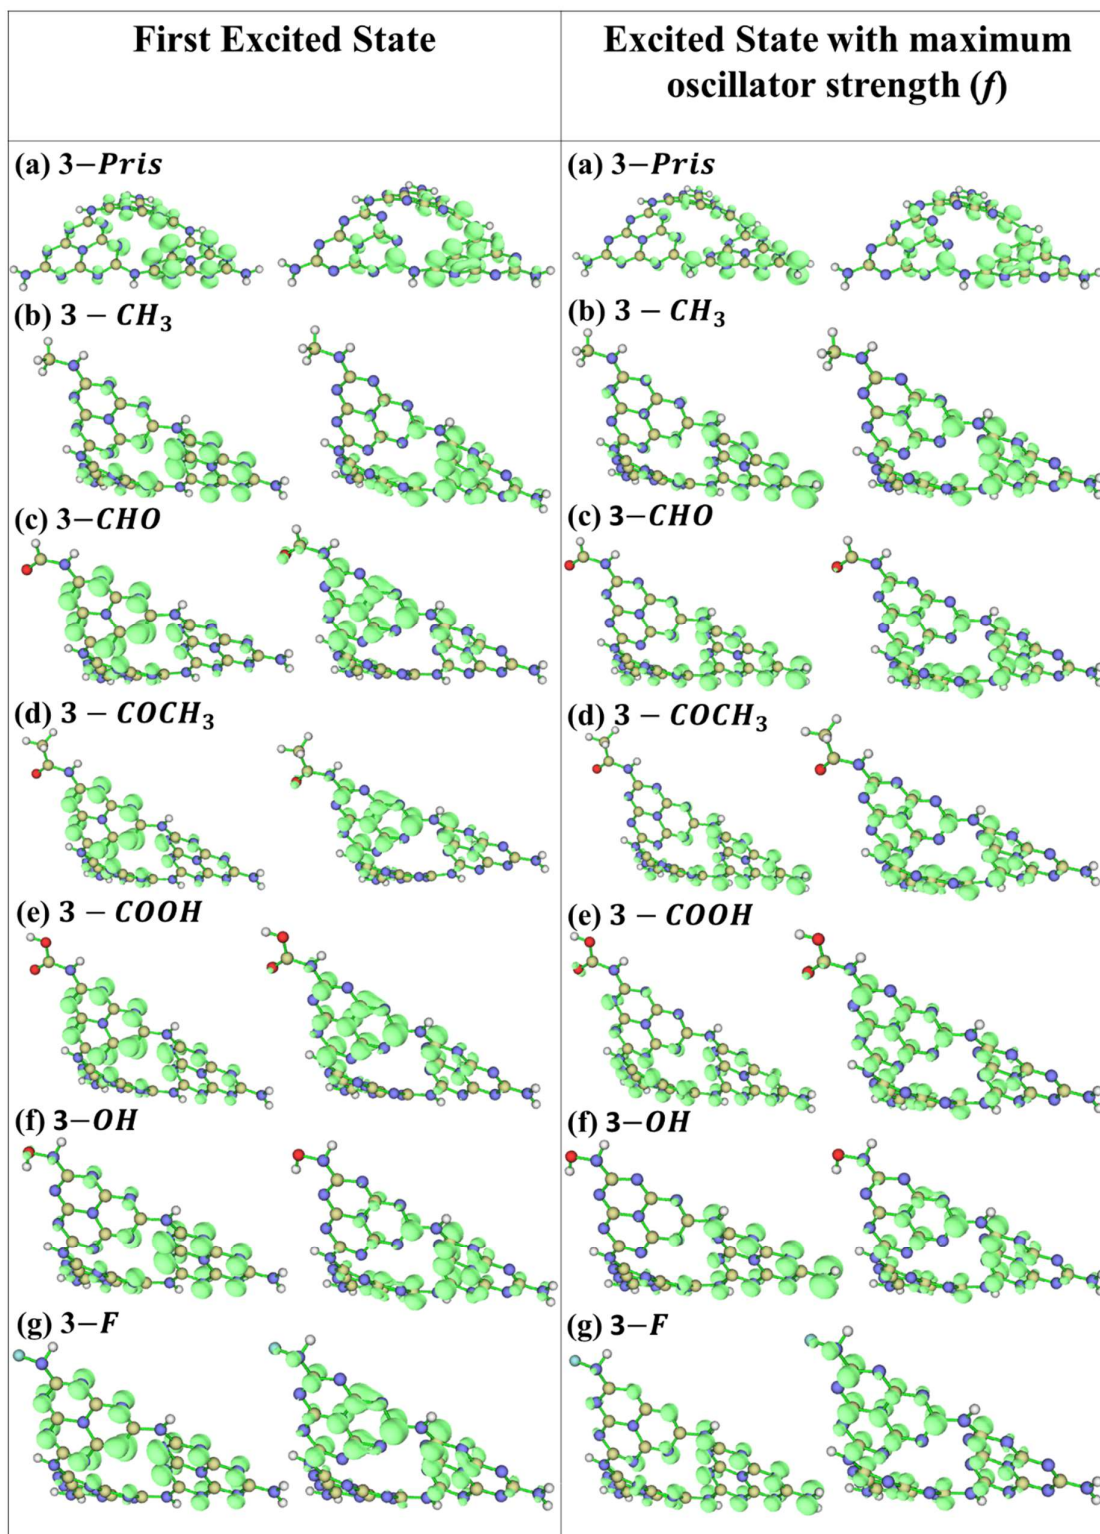

**Figure S9:** Spatial distribution (shown in green) of the photo-induced electrons (right) and holes (left) at the first excited state and the excited state with maximum oscillator strength for the 3-X structures. Here yellow, blue, grey, red, and cyan spheres represent the carbon, nitrogen, hydrogen, oxygen, and fluorine atoms, respectively.

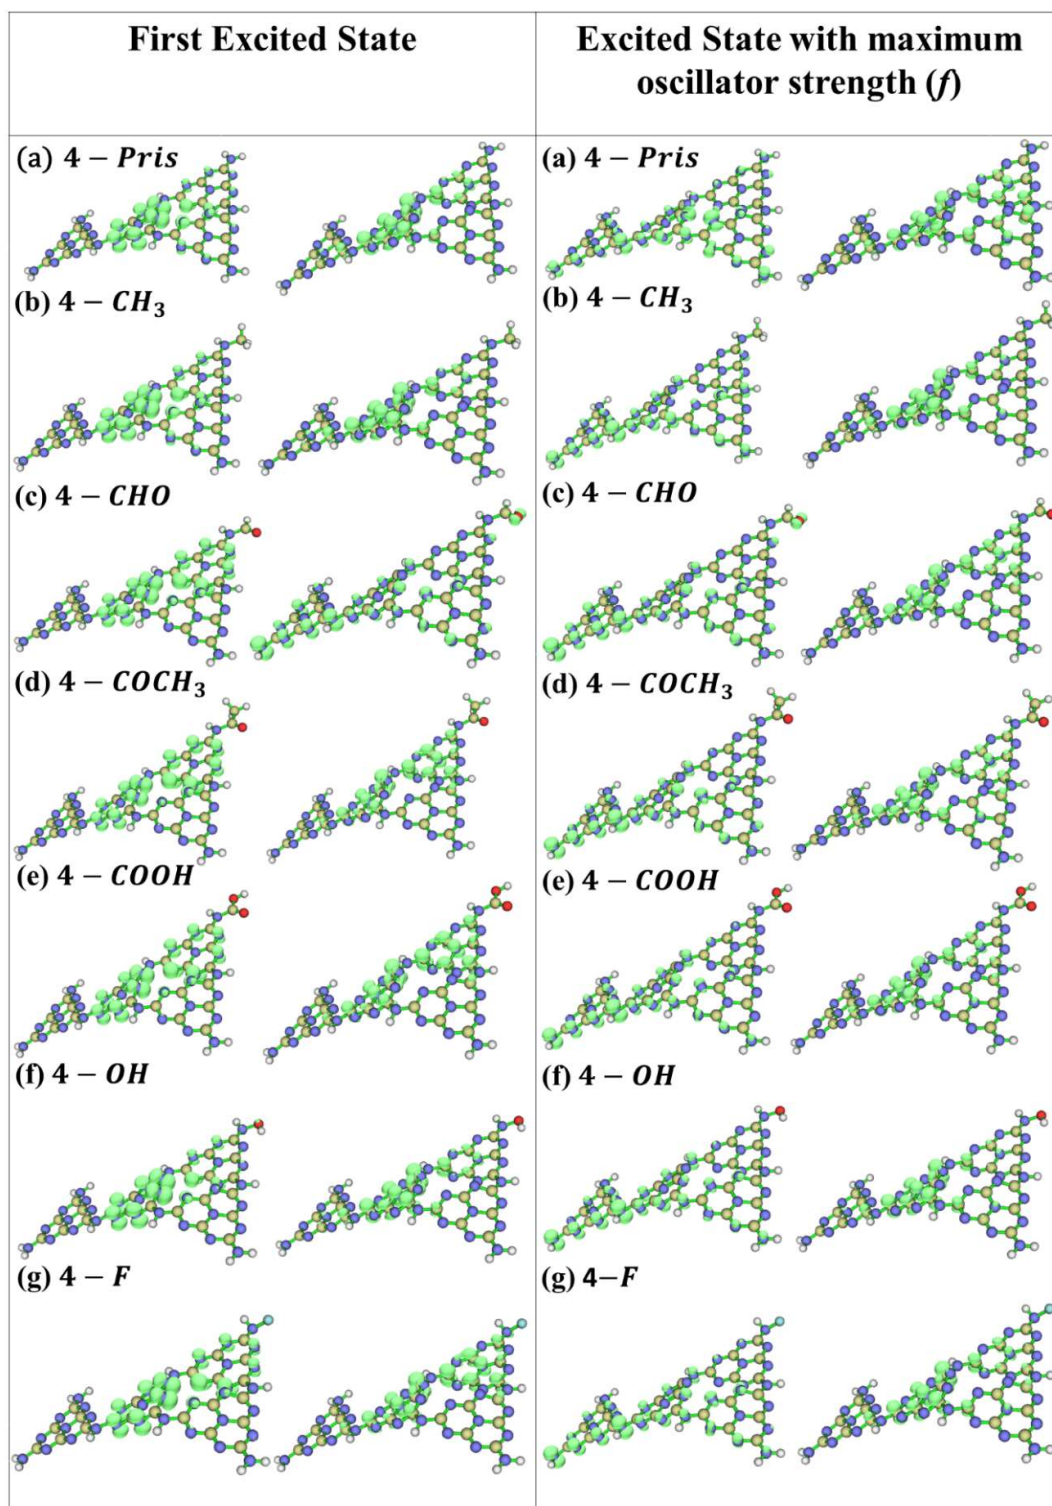

**Figure S10:** Spatial distribution (shown in green) of the photo-induced electrons (right) and holes (left) at the first excited state and the excited state with maximum oscillator strength for the 4-X structures. Here yellow, blue, grey, red, and cyan spheres represent the carbon, nitrogen, hydrogen, oxygen, and fluorine atoms, respectively.



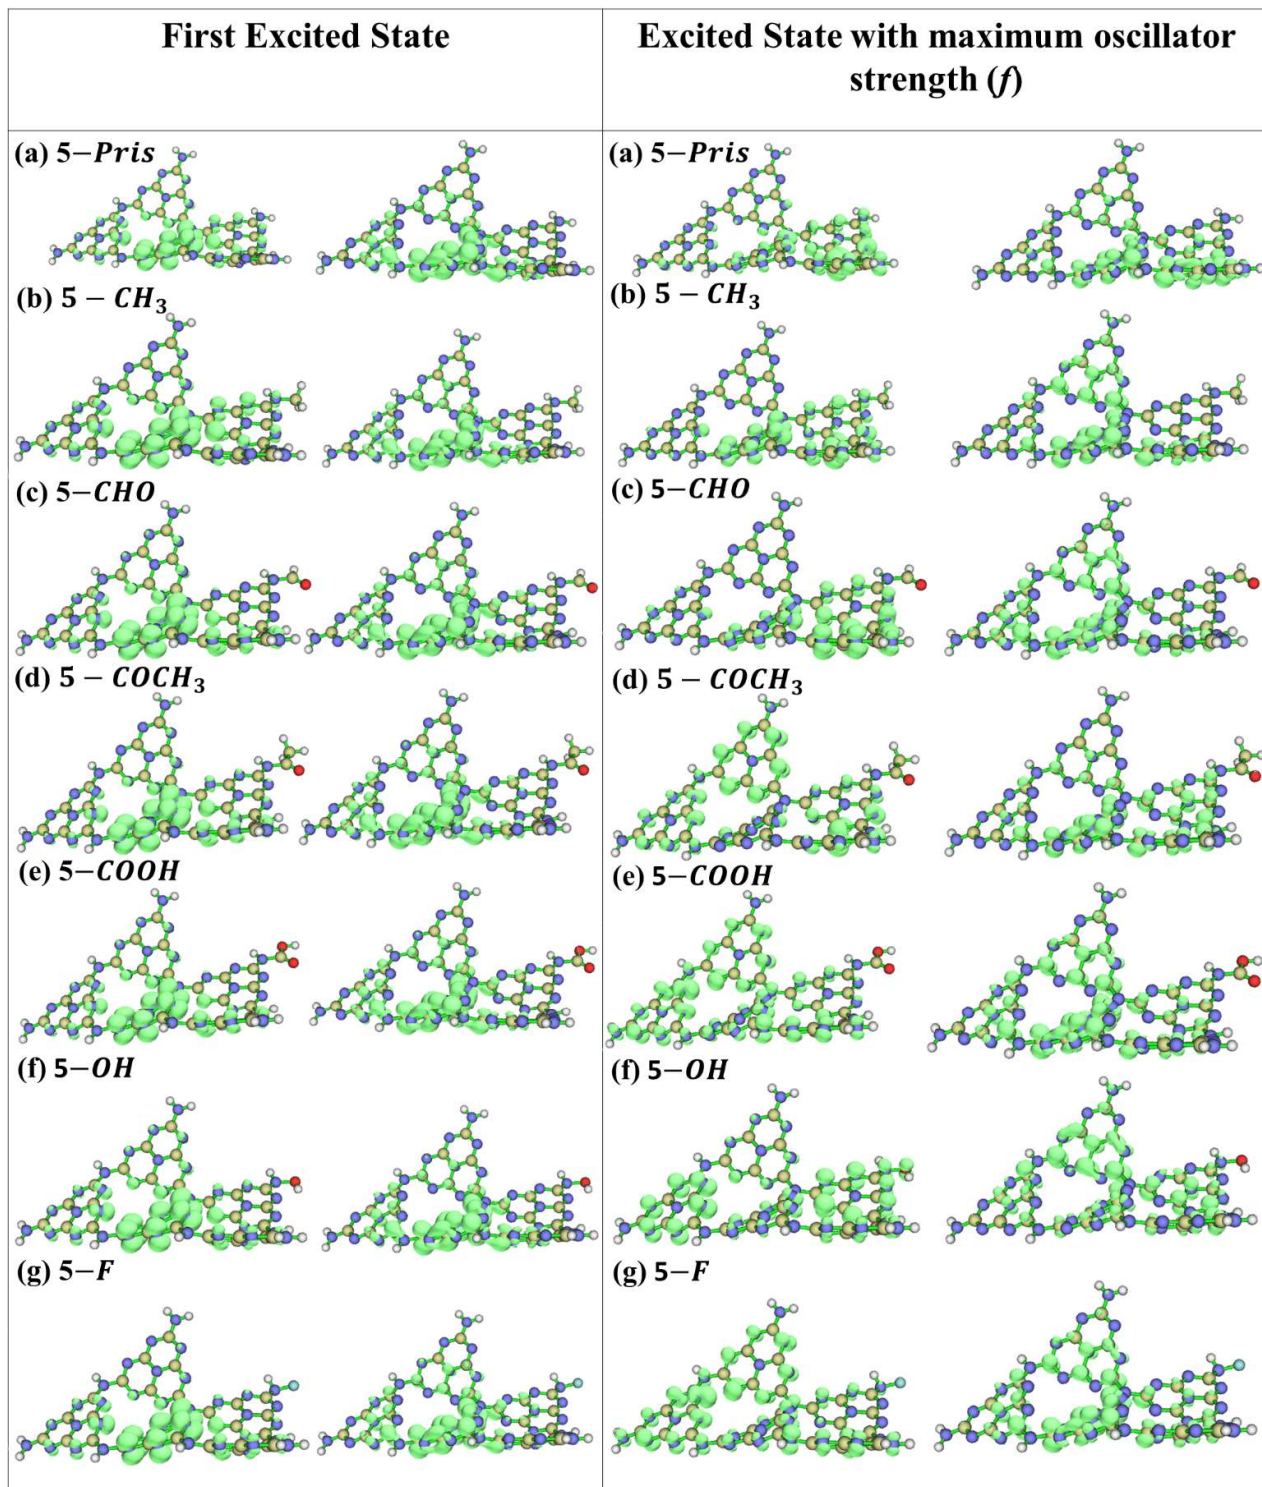

**Figure S11:** Spatial distribution (shown in green) of the photo-induced electrons (right) and holes (left) at the first excited state and the excited state with maximum oscillator strength for the 5-X structures. Here yellow, blue, grey, red, and cyan spheres represent the carbon, nitrogen, hydrogen, oxygen, and fluorine atoms, respectively.

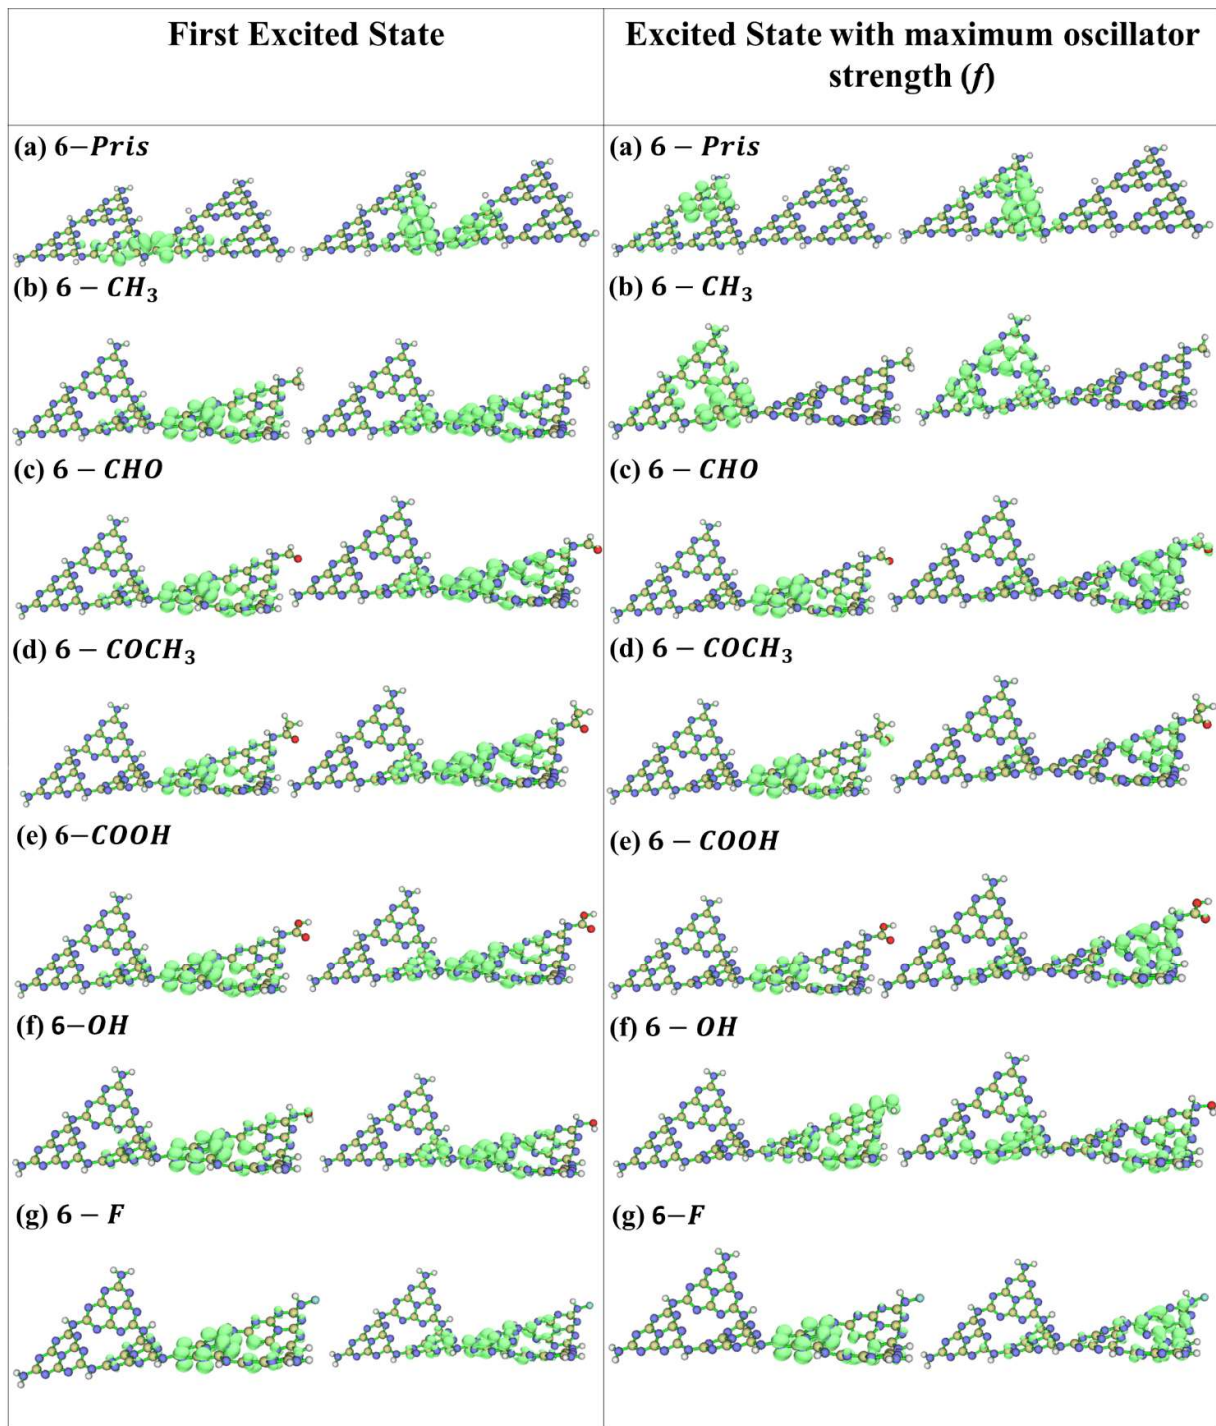

**Figure S12:** Spatial distribution (shown in green) of the photo-induced electrons (right) and holes (left) at the first excited state and the excited state with maximum oscillator strength for the 6-X structures. Here golden, blue, grey, red, and cyan spheres represent the carbon, nitrogen, hydrogen, oxygen, and fluorine atoms, respectively.
